# Supplementary material for: Constructing a prognostic model for colon cancer: insights from immunity-related genes
Source: BMC Cancer. 2024 Jun 24;24:758. doi: 10.1186/s12885-024-12507-z (PMC11197172; doi:10.1186/s12885-024-12507-z)
Supplement: Supplementary file 7 — Supplementary Material 7 [file 12885_2024_12507_MOESM7_ESM.xlsx]

## Sheet: 工作表1
Table S1:Clinical information on Cohort 1 (fresh tissues)
Patients	Gender	Age(years old)	TNM stage	Cancer subtype
1	Male	60	IIIC	colon carcinoma
2	Female	75	IIIB	colon carcinoma
3	Female	60	IIIB	colon carcinoma
4	Female	61	IIIB	colon carcinoma
5	Female	74	IIA	colon carcinoma
6	Female	73	IIA	colon carcinoma
7	Female	45	IIA	colon carcinoma
8	Male	75	IIIB	colon carcinoma
9	Female	62	IIA	colon carcinoma
10	Male	65	IIA	colon carcinoma
11	Male	69	IIIB	colon carcinoma
12	Female	51	IIA	colon carcinoma
13	Female	56	IIIB	colon carcinoma
14	Male	64	IIA	colon carcinoma
15	Male	65	IIB	colon carcinoma
16	Female	65	IIIB	colon carcinoma
17	Male	67	IIA	colon carcinoma
18	Male	57	IIIB	colon carcinoma
19	Female	57	IIIB	colon carcinoma
20	Female	75	IIIB	colon carcinoma
